# Supplementary material for: Attenuation of a Pathogenic Mycoplasma Strain by Modification of the obg Gene by Using Synthetic Biology Approaches
Source: PubMed Central journal article supplement (PMC6531878; doi:10.1128/msphere.00030-19), 2019-05-22

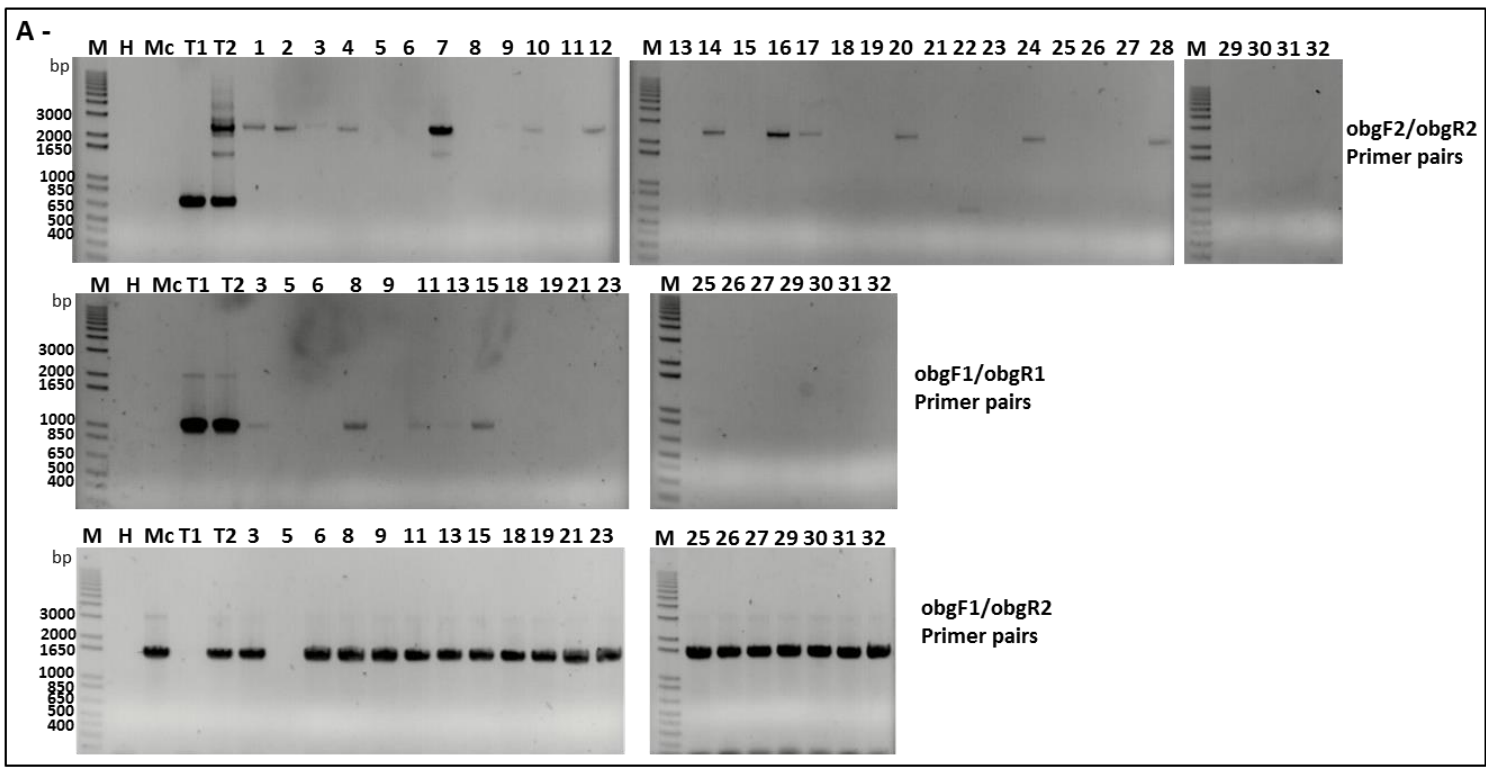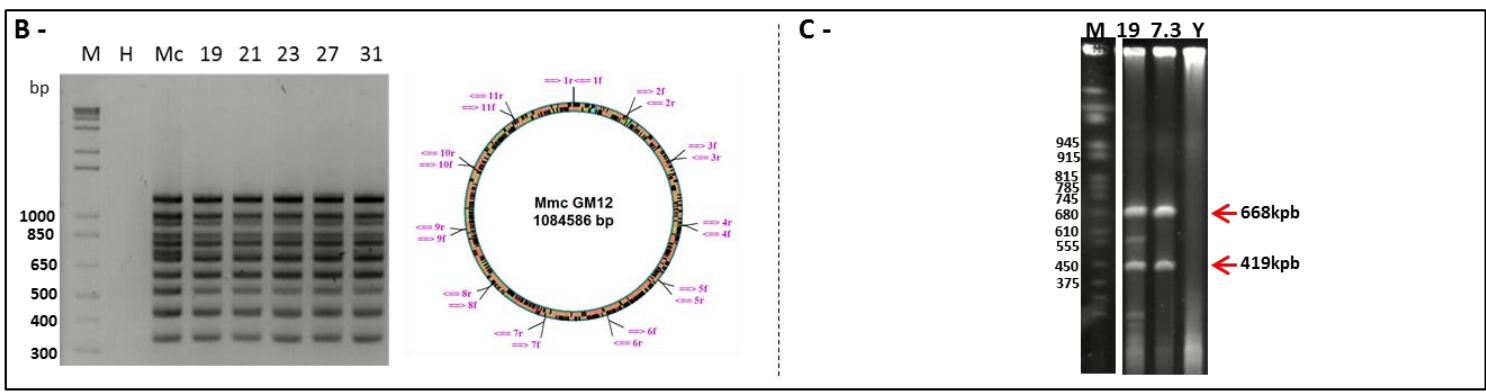

Supplement: mSphere.00030-19-sf004.pdf [file mSphere.00030-19-sf004.pdf]
